# Supplementary material
Source: publisher figshare collection journal article supplement (https://acs.figshare.com/ndownloader/files/5062348)
Supplement: Supplementary file 1 [file 5062348]

# Peptide-Labeled Near-Infrared Quantum Dots for Imaging Tumor Vasculature in Living Subjects

*Weibo Cai,<sup>†</sup> Dong-Woon Shin,<sup>‡</sup> Kai Chen,<sup>†</sup> Olivier Gheysens,<sup>†</sup> Qizhen Cao,<sup>†</sup> Shan X. Wang,<sup>‡</sup> Sanjiv S.  
Gambhir,<sup>†,§</sup> and Xiaoyuan Chen<sup>\*,†</sup>*

<sup>†</sup> Molecular Imaging Program at Stanford (MIPS) and Bio-X Program, Department of Radiology,  
Stanford University School of Medicine, 1201 Welch Road, Stanford, California 94305; <sup>‡</sup> Department of  
Materials Science and Engineering, Stanford University, 476 Lomita Mall, Stanford, California 94305; <sup>§</sup>  
Department of Bioengineering, Stanford University School of Medicine, Stanford, California 94305

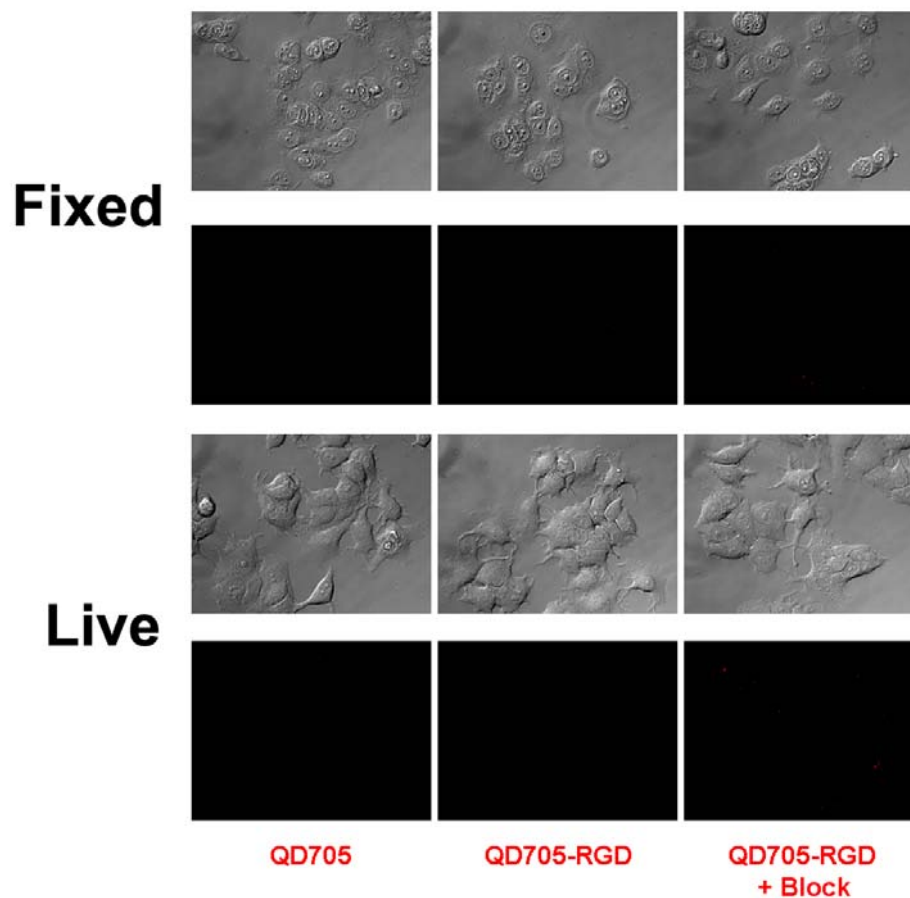

**Supplementary Figure 1.** *In vitro* staining of human breast cancer MCF-7 cells (low integrin  $\alpha_v\beta_3$  expression) using 1 nM QD705, QD705-RGD and 1 nM QD705-RGD with 2  $\mu$ M c(RGDyK) (denoted as “**QD705-RGD + Block**”). Filter set: excitation 420/40 nm, emission 705/40 nm. Magnification: 400 $\times$ , 0.5 s exposure. All fluorescence images in **Supplementary Figure 1-3** were acquired under the same condition and displayed under the same scale.

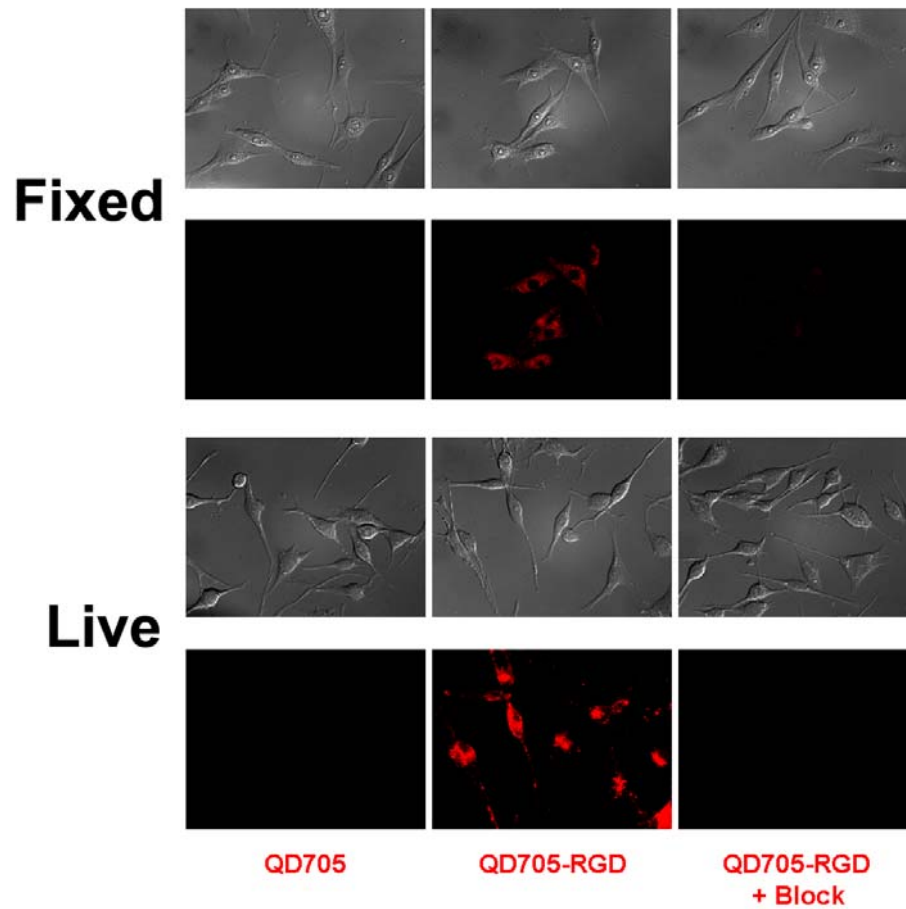

**Supplementary Figure 2.** *In vitro* staining of human breast cancer MDA-MB-435 cells (medium integrin  $\alpha_v\beta_3$  expression) using 1 nM QD705, QD705-RGD and 1 nM QD705-RGD with 2  $\mu$ M c(RGDyK) (denoted as “**QD705-RGD + Block**”). Filter set: excitation 420/40 nm, emission 705/40 nm. Magnification: 400 $\times$ , 0.5 s exposure.

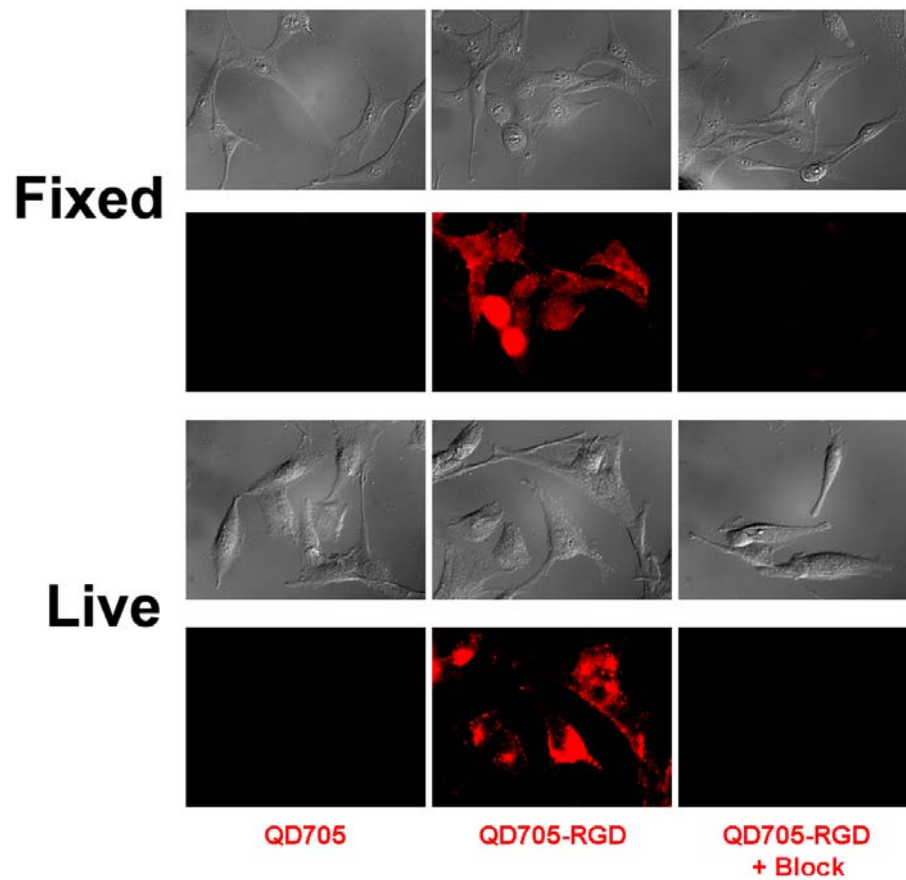

**Supplementary Figure 3.** *In vitro* staining of human glioblastoma U87MG cells (high integrin  $\alpha_v\beta_3$  expression) using 1 nM QD705, QD705-RGD and 1 nM QD705-RGD with 2  $\mu$ M c(RGDyK) (denoted as “**QD705-RGD + Block**”). Filter set: excitation 420/40 nm, emission 705/40 nm. Magnification: 400 $\times$ , 0.5 s exposure.

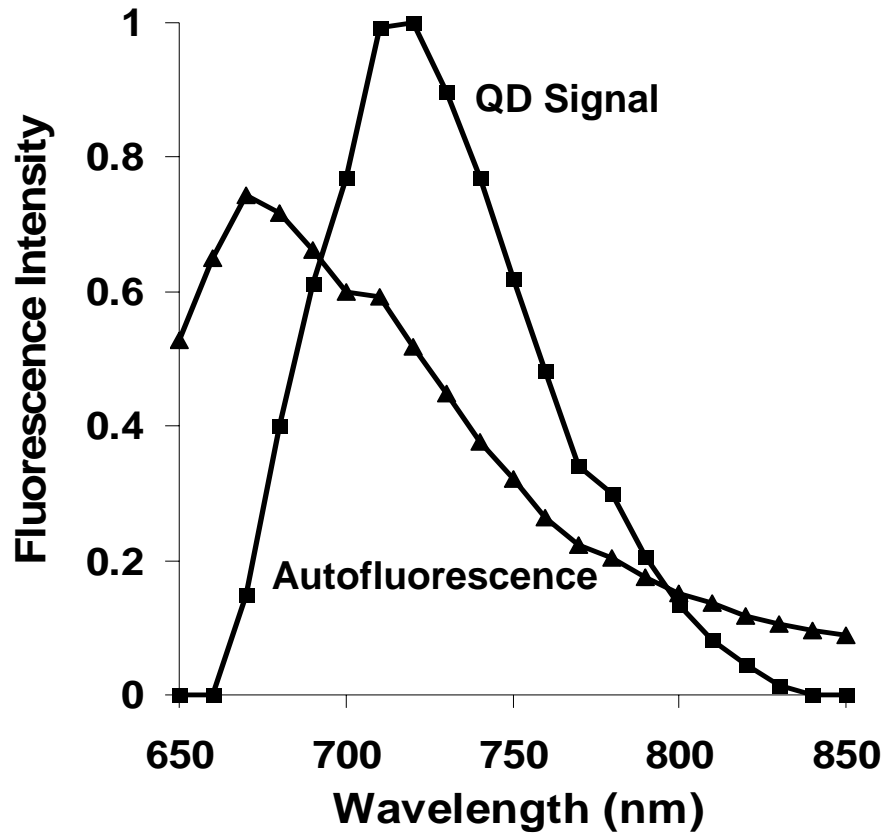

**Supplementary Figure 4.** The “pure” autofluorescence and QD spectra used for spectral unmixing. The autofluorescence spectrum was obtained from normal mouse without QD injection. QD spectrum was obtained by subtraction of the autofluorescence signal from the mixture signal of QD-injected mouse.
